# Supplementary material
Source: Springer Nature journal article supplement (https://www.springermedizin.de/resource/supplementary/12958_2014_1309_MOESM2_ESM.pdf/9567000)
Supplement: MOESM2 [file 9567000]

## Mature females

C 16 32 48 72 PMSG

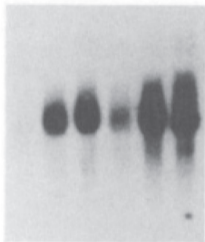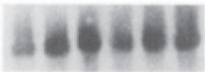

## Immature females

Control rhFSH  
Gr Th Gr Th  
cells cells cells cells

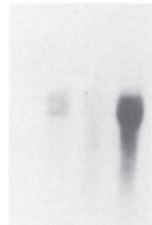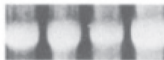

IU FSH

PMSG = pregnant mare serum gonadotropin; IU = international units;  
Gr = granulosa; Th = theca
